# Supplementary material for: Olivine-type cadmium germanate: a new sensing semiconductor for the detection of formaldehyde at the ppb level
Source: Royal Society of Chemistry journal article supplement (doi:10.1039/d1qi00772f), 2021-01-01
Supplement: d1qi00772f1.pdf [file d1qi00772f1.pdf]

## Supporting Information

### **Olivine-type cadmium germanate: A new sensing semiconductor for the detection of formaldehyde at ppb level**

Jiayu Li,<sup>a</sup> Qihua Liang,<sup>a</sup> Bo Zhang,<sup>b</sup> Hui Chen,<sup>a</sup> Xinhua Tian,<sup>a</sup> Meihong Fan,<sup>a</sup> Yunjia Guo,<sup>a</sup> Ni Bai,<sup>c</sup> Xiaoxin Zou<sup>a</sup> and Guo-Dong Li <sup>\*a</sup>

<sup>a</sup> State Key Laboratory of Inorganic Synthesis and Preparative Chemistry, College of Chemistry, Jilin University, Changchun 130012, P. R. China

<sup>b</sup> International Center of Future Science, Jilin University, Changchun13012, P. R. China

<sup>c</sup> School of Mechanical and Metallurgical Engineering, Jiangsu University of Science and Technology, Zhangjiagang 215600, P. R. China

\*Corresponding Author:

State Key Laboratory of Inorganic Synthesis and Preparative Chemistry, College of Chemistry, Jilin University, Changchun 130012, P. R. China

**E-mail address:** [lgd@jlu.edu.cn](mailto:lgd@jlu.edu.cn)

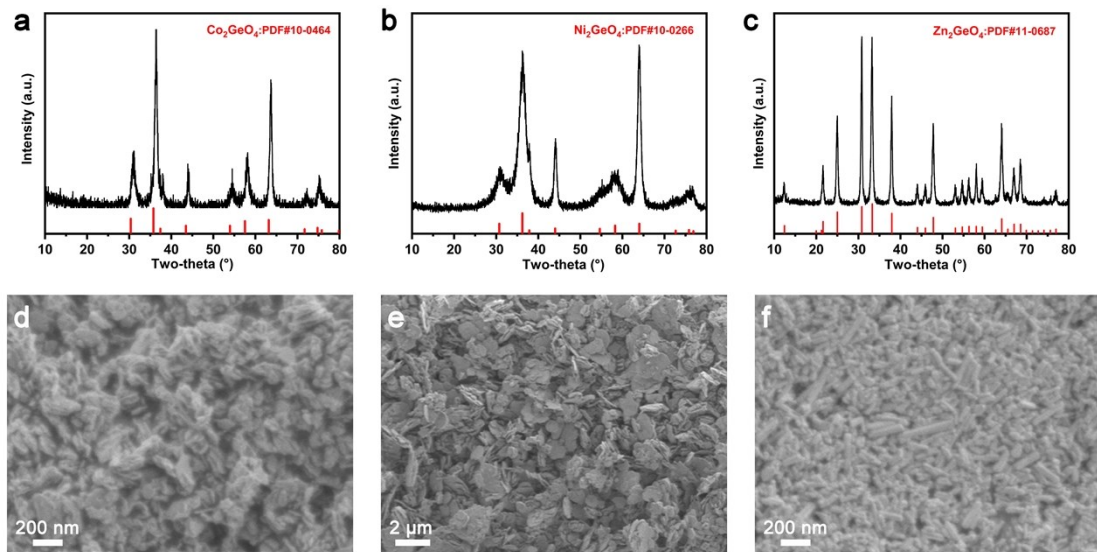

**Fig. S1** (a-c) XRD patterns and (d-f) SEM images of  $\text{Co}_2\text{GeO}_4$ ,  $\text{Ni}_2\text{GeO}_4$  and  $\text{Zn}_2\text{GeO}_4$ , respectively.

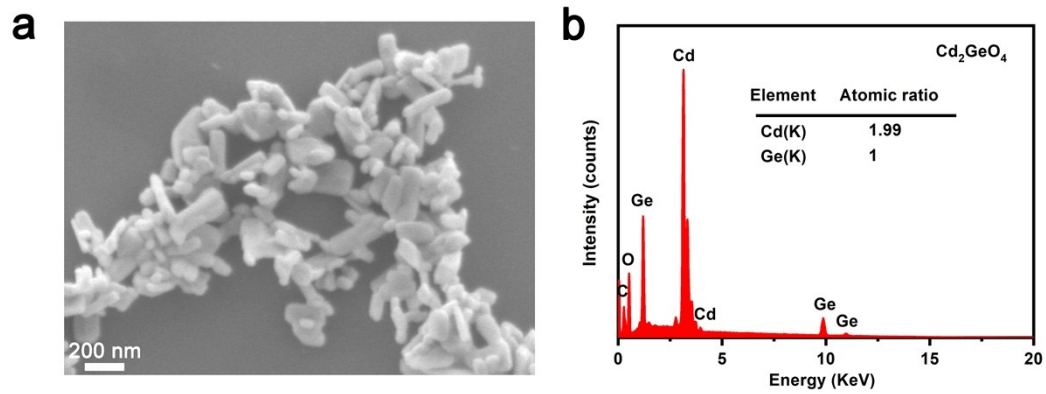

**Fig. S2** (a) SEM image and (b) EDS spectrum of  $\text{Cd}_2\text{GeO}_4$ .

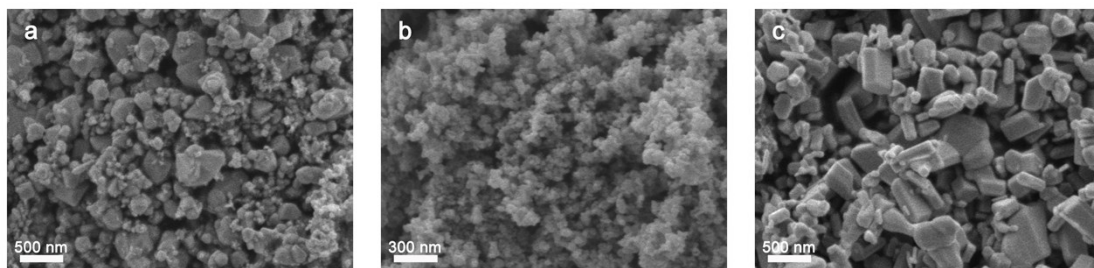

**Fig. S3** SEM image of (a)  $\text{SnO}_2$ , (b)  $\text{In}_2\text{O}_3$  and (c)  $\text{ZnO}$ , respectively.

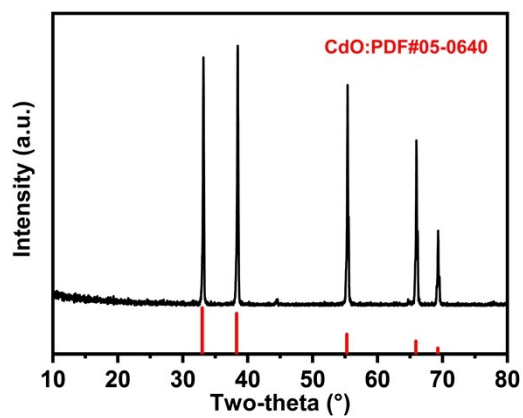

**Fig. S4** XRD patterns and the standard PDF card of CdO (PDF No. 05-0640).

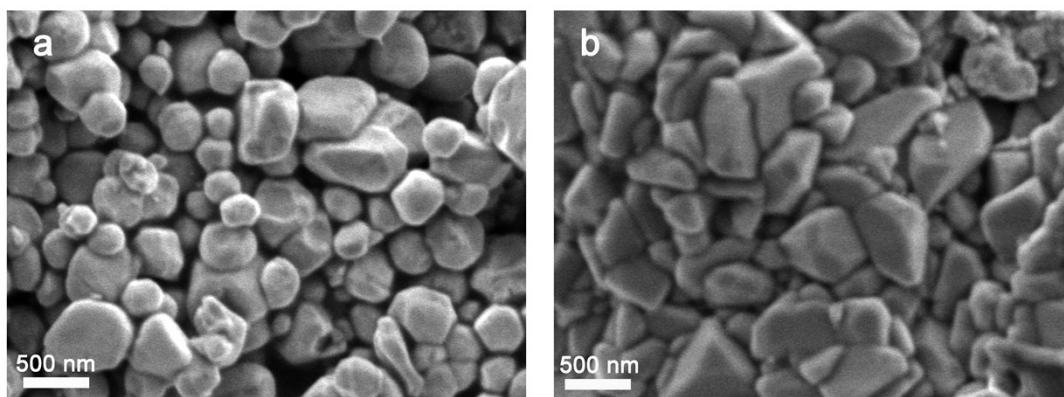

**Fig. S5** SEM image of (a) CdO and (b) GeO<sub>2</sub>.

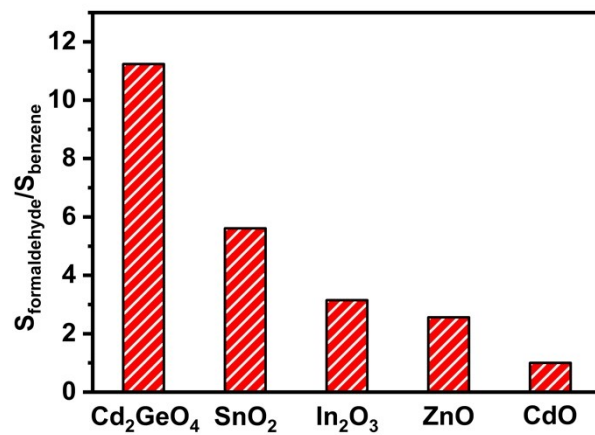

**Fig. S6** The response of sensors based on  $\text{Cd}_2\text{GeO}_4$ ,  $\text{SnO}_2$ ,  $\text{In}_2\text{O}_3$ ,  $\text{ZnO}$  and  $\text{CdO}$  to 10 ppm formaldehyde vs benzene ( $S_{\text{formaldehyde}}/S_{\text{benzene}}$ , 140 °C).

**Table S1** Gas response, operating temperature, and Response-recovery times of different nanostructured metal oxides to formaldehyde, as reported in the recent literatures 1-11 and this work.

| <b>Sensing materials</b>         | <b>Synthetic method</b> | <b>BET surface area (m<sup>2</sup>/g)</b> | <b>Conc. (ppm)</b> | <b>S<sub>formaldehyde</sub></b> | <b>T<sub>sens</sub> (°C)</b> | <b>t<sub>res</sub>/t<sub>rec</sub> (s)</b> | <b>Ref.</b> |
|----------------------------------|-------------------------|-------------------------------------------|--------------------|---------------------------------|------------------------------|--------------------------------------------|-------------|
| ZnO                              | Hydrothermal            | -                                         | 100                | 9.6                             | 275                          | 16/28                                      | 1           |
| In <sub>2</sub> O <sub>3</sub>   | Hydrothermal            | 129.81                                    | 20                 | ≈5                              | 130                          | -                                          | 2           |
| SnO <sub>2</sub>                 | Hydrothermal            | 38.31                                     | 100                | 10.6                            | 200                          | 53/99                                      | 3           |
| WO <sub>3</sub>                  | Hydrothermal            | -                                         | 100                | 6.5                             | 350                          | 9/6                                        | 4           |
| NiO                              | Hydrothermal            | 109                                       | 100                | ≈12                             | 300                          | -                                          | 5           |
| CuO                              | Hydrothermal            | 6.91                                      | 0.8                | ≈1.2                            | 300                          | 45/106                                     | 6           |
| ZnSnO <sub>3</sub>               | Precipitation           | 37                                        | 100                | 10.7                            | 220                          | 6/80                                       | 7           |
| LaFeO <sub>3</sub>               | Sol-gel                 | -                                         | 50                 | 14.2                            | 100                          | 33/27                                      | 8           |
| ZnCo <sub>2</sub> O <sub>4</sub> | Hydrothermal            | 121                                       | 100                | 7.4                             | 180                          | 9/12                                       | 9           |
| CdGa <sub>2</sub> O <sub>4</sub> | Electrospinning         | 27                                        | 10                 | 18.4                            | 100                          | 7/130                                      | 10          |
| Zn <sub>2</sub> SnO <sub>4</sub> | Hydrothermal            | -                                         | 10                 | 10.1                            | 160                          | -                                          | 11          |
| Cd <sub>2</sub> GeO <sub>4</sub> | Hydrothermal            | ≈10                                       | 10                 | 14.1                            | 140                          | 5/99                                       | This work   |



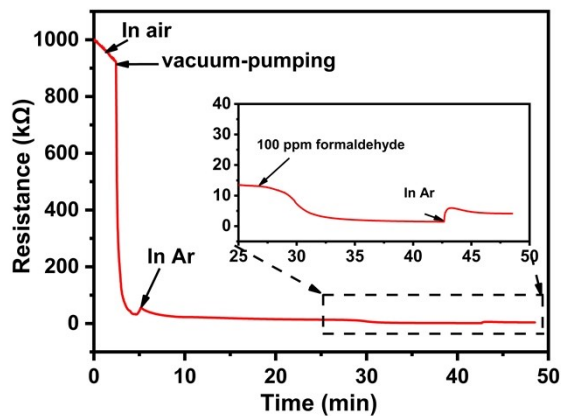

**Fig. S7** The change in resistance of sensor based on Cd<sub>2</sub>GeO<sub>4</sub> during vacuum extraction and gas-sensing properties of sensor based on Cd<sub>2</sub>GeO<sub>4</sub> was measured in the absence of background oxygen using a homemade device.

## References for SI

- 1 X. San, M. Li, D. Liu, G. Wang, Y. Shen, D. Meng and F. Meng, A facile one-step hydrothermal synthesis of NiO/ZnO heterojunction microflowers for the enhanced formaldehyde sensing properties, *Journal of Alloys and Compounds*, 2018, **739**, 260-269.
- 2 Z. Wang, C. Hou, Q. De, F. Gu and D. Han, One-Step Synthesis of Co-Doped In<sub>2</sub>O<sub>3</sub> Nanorods for High Response of Formaldehyde Sensor at Low Temperature, *ACS Sens*, 2018, **3**, 468-475.
- 3 D. Meng, D. Liu, G. Wang, Y. Shen, X. San, M. Li and F. Meng, Low-temperature formaldehyde gas sensors based on NiO-SnO<sub>2</sub> heterojunction microflowers assembled by thin porous nanosheets, *Sensors and Actuators B: Chemical*, 2018, **273**, 418-428.
- 4 H. Yu, J. Li, Y. Tian, and Z. Li, Gas Sensing and Electrochemical Behaviors of Ag-doped 3D Spherical WO<sub>3</sub> Assembled by Nanostrips to Formaldehyde, *International Journal of Electrochemical Science*, 2018, **13**, 9281-9291.
- 5 X. Lai, G. Shen, P. Xue, B. Yan, H. Wang, P. Li, W. Xia and J. Fang, Ordered mesoporous NiO with thin pore walls and its enhanced sensing performance for formaldehyde, *Nanoscale*, 2015, **7**, 4005-4012.
- 6 H. J. Park, N. J. Choi, H. Kang, M. Y. Jung, J. W. Park, K. H. Park and D. S. Lee, A ppb-level formaldehyde gas sensor based on CuO nanocubes prepared using a polyol process, *Sensors and Actuators B: Chemical*, 2014, **203**, 282-288.
- 7 T. Zhou, T. Zhang, R. Zhang, Z. Lou, J. Deng and L. Wang, Hollow ZnSnO<sub>3</sub> cubes with controllable shells enabling highly efficient chemical sensing detection of formaldehyde vapors, *ACS Appl Mater Interfaces*, 2017, **9**, 14525-14533.
- 8 Y. Zhang, B. Jiang, M. Yuan, P. Li, W. Li and X. Zheng, Formaldehyde-sensing properties of LaFeO<sub>3</sub> particles synthesized by citrate sol-gel method, *Journal of Sol-Gel Science and Technology*, 2016, **79**, 167-175.
- 9 T. Zhou, N. Sui, R. Zhang and T. Zhang, Cabbage-shaped zinc-cobalt oxide (ZnCo<sub>2</sub>O<sub>4</sub>) sensing materials: Effects of zinc ion substitution and enhanced formaldehyde sensing properties, *J Colloid Interface Sci*, 2019, **537**, 520-527.
- 10 H. Chen, L. Sun, G. D. Li and X. Zou, Well-tuned surface oxygen chemistry of cation off-stoichiometric spinel oxides for highly selective and sensitive formaldehyde detection, *Chemistry of Materials*, 2018, **30**, 2018-2027.
- 11 X. Li, N. Zhang, C. Liu, S. Adimi, J. Zhou, D. Liu and S. Ruan, Enhanced gas sensing properties for formaldehyde based on ZnO/Zn<sub>2</sub>SnO<sub>4</sub> composites from one-step hydrothermal synthesis, *Journal of Alloys and Compounds*, 2021, **850**.
